# Supplementary material for: Extraction and isolation of polyhydroxy triterpenoids from Rosa laevigata Michx. fruit with anti-acetylcholinesterase and neuroprotection properties
Source: Royal Society of Chemistry journal article supplement (doi:10.1039/c8ra07930g), 2018-01-01
Supplement: c8ra07930g1.pdf [file c8ra07930g1.pdf]

## Electronic Supplementary Information

# Extraction and isolation of polyhydroxy triterpenoids from *Rosa laevigata* Michx. fruit with anti-acetylcholinesterase and neuroprotection properties

Pinyi Gao<sup>a,b</sup>, Ting Han<sup>a</sup>, Mei Jin<sup>a</sup>, Danqi Li<sup>b</sup>, Fuyu Jiang<sup>a</sup>, Lixin Zhang<sup>b\*</sup> and Xuegui Liu<sup>a,b\*</sup>

<sup>a</sup>College of Pharmaceutical and Biological Engineering, Shenyang University of Chemical Technology, Shenyang 110142, China., <sup>b</sup>Institute of Functional Molecules, Shenyang University of Chemical Technology, Shenyang 110142, China

College of Pharmaceutical and Biological Engineering

Shenyang University of Chemical Technology

11 Street, Shenyang Liaoning

P.R. China

Tel.: +86-13840113203

E-mail:

[gpy1981@163.com](mailto:gpy1981@163.com)

## List of supplementary content

### S. 1.1 Structures of compounds 1 and 2

**Figure S1.1** Structures of compounds 1 and 2

### S. 2.1 Contour plots displaying the interaction effects

**Figure. S2.1** Contour plots displaying the interaction effects of  $X_1$  and  $X_2$  (a),  $X_1$  and  $X_3$  (b),  $X_1$  and  $X_4$  (c),  $X_2$  and  $X_3$  (d),  $X_2$  and  $X_4$  (e),  $X_3$  and  $X_4$  (f) on the saponin content yield of *Rosa laevigata* Michx. fruits.  $X_1$ : ethanol concentration;  $X_2$ : extraction time;  $X_3$ : ratio of liquid to raw material;  $X_4$ : microwave power

### S. 3.1 Acid Hydrolysis of compound 2 and PMP-HPLC analysis

**Figure S3.1** High-performance liquid chromatography of standard solution and samples solution. A: standard solutions, (1): saponin, (2): sapogenin; B: sample solutions, (5): saponin, (7): sapogenin

### S. 4.1 Characteristic data of compounds

**Figure S4.1**  $^1\text{H}$  NMR spectrum (500 MHz,  $\text{C}_5\text{D}_5\text{N}$ ) of compound 1

**Figure S4.2**  $^{13}\text{C}$  NMR spectrum (125 MHz,  $\text{C}_5\text{D}_5\text{N}$ ) of compound 1

**Figure S4.3** ESI-MS spectrum of compound 1

**Figure S4.4**  $^1\text{H}$  NMR spectrum (500 MHz, MeOD) of compound 2

**Figure S4.5**  $^{13}\text{C}$  NMR spectrum (125 MHz, MeOD) of compound 2

**Figure S4.6** ESI-MS spectrum of compound 2

**Table S1**  $^{13}\text{C}$  NMR (125 MHz) data for compounds 1 and 2 (in  $\text{C}_5\text{D}_5\text{N}$  and MeOD).

### S. 5.1 Experimental design and statistical analysis

**Table S2** Levels and code of variable used for Box–Behnken design (BBD).

### S. 6.1 Single-factor experiments and results

**Figure S6.1** Effects of the extraction time ( $X_1$ ), extraction time ( $X_2$ ), liquid to raw material ( $X_3$ ) and microwave power ( $X_4$ ) on the saponin content of *Rosa laevigata* Michx. fruits.

### S. 7.1 Validation of the predictive model

**Table S3** Predicted and experimental values of the responses at optimal conditions.

### S. 8.1 Preparation of standard solutions and sample solutions

**S. 8.1.1** The preparation of standard solutions

**S. 8.1.2** The preparation of sample solutions

### S. 9.1 Validation of the predictive model

**S. 9.1.1** Linearity studies.

**S. 9.1.2** The precision studies

**S. 9.1.3** Reproducibility of this method

**S. 9.1.4** Recovery studies

**S. 9.1.5** Stability test of the solutions

**Figure S9.1** The standard curves of compounds 1 and 2 (a and b) for Linearity studies.

**Table S4** Recoveries of compounds 1 and 2.

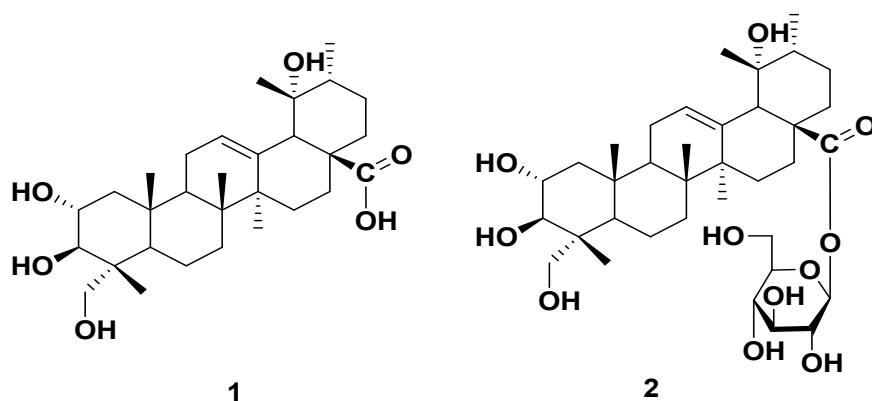

**Figure S1.1** Structures of compounds **1** and **2**.

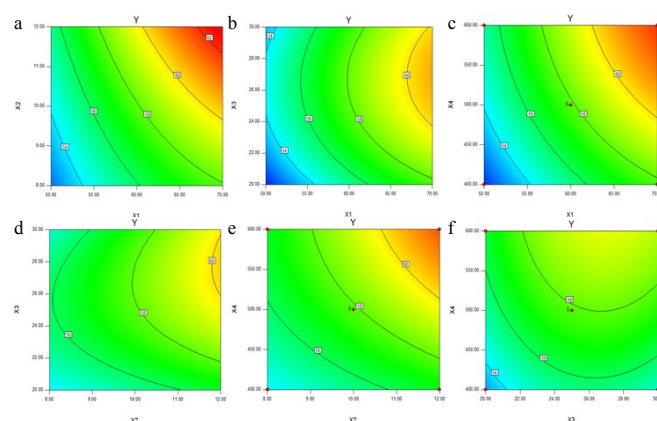

**Figure. S2.1** Contour plots displaying the interaction effects of  $X_1$  and  $X_2$  (a),  $X_1$  and  $X_3$  (b),  $X_1$  and  $X_4$  (c),  $X_2$  and  $X_3$  (d),  $X_2$  and  $X_4$  (e),  $X_3$  and  $X_4$  (f) on the saponin content yield of *Rosa laevigata* Michx. fruits.  $X_1$ : ethanol concentration;  $X_2$ : extraction time;  $X_3$ : ratio of liquid to raw material;  $X_4$ : microwave power

### S. 3.1 Acid Hydrolysis of compound **2** and PMP-HPLC analysis

Compound **2** (50.0 mg) was individually hydrolyzed by 2N HCl (50.0 mL) under reflux for 3 h. The reaction mixtures were extracted with EtOAc, and the organic layer evaporated under reduced pressure to yield **1**. The dried aqueous layer and D-glucose (each 5 mg) were dissolved in 0.5 mL water and treated with 0.5 mL of PMP methanol solution (0.5 mol/L) and 1 mL of NaOH solution (0.6 mol/L) at 70 °C for 100 min. Cooled to room temperature, added 2 mL of HCl solution (0.3 mol/L) for neutralization of residual alkali. The reaction mixture was added distilled water (30 mL) and then extracted with  $\text{CH}_2\text{Cl}_2$  (30 mL) 3 times. The PMP derivative of **2** was determined by HPLC equipped with a Promosil  $\text{C}_{18}$  Column (5  $\mu\text{m}$ , 250 mm  $\times$  4.6 mm) at 30 °C and the flow rate was 0.8 mL/min. The mobile phase was methanol (**A**): phosphate buffer solution (0.1 mol/mL) (**B**) (A:B = 18:82, v/v). The operating conditions were as follows: detective wavelength, 245 nm; injection volume, 20  $\mu\text{L}$ .

### S. 3.1 Characteristic data of compounds

**2 $\alpha$** , **3 $\beta$** , **19 $\alpha$** , **23-tetrahyd roxyurs-12-en-28-oic acid (1)**:

an amorphous white powder (C<sub>5</sub>D<sub>5</sub>N), mp 280~282 °C. ESI-MS (m/z): 1031.67 [2M+Na]<sup>+</sup>, 527.32 [M+Na]<sup>+</sup>. <sup>1</sup>H-NMR (500 MHz, C<sub>5</sub>D<sub>5</sub>N): δ<sub>H</sub> 5.55 (1H, br s), 4.23 (1H, dt, *J* = 9.6, 4.2 Hz), 4.17 (1H, d, *J* = 10.8 Hz), 4.15 (1H, d, *J* = 10.8 Hz), 3.69 (1H, d, *J* = 9.6 Hz), 3.06 (1H, dt, *J* = 8.4, 2.4 Hz), 3.01 (1H, s), 1.62 (3H, s), 1.48 (3H, s), 1.10 (3H, s), 1.09 (3H, d, *J* = 6.4 Hz), 1.07 (3H, s), 1.04 (3H, s). <sup>13</sup>C-NMR (125 MHz, C<sub>5</sub>D<sub>5</sub>N): δ<sub>C</sub> 47.8 (C-1), 68.8 (C-2), 78.3 (C-3), 42.1 (C-4), 47.9 (C-5), 18.6 (C-6), 33.1 (C-7), 40.4 (C-8), 47.8 (C-9), 38.3 (C-10), 24.1 (C-11), 127.9 (C-12), 139.9 (C-13), 42.1 (C-14), 29.2 (C-15), 26.3 (C-16), 48.3 (C-17), 54.5 (C-18), 72.6 (C-19), 42.3 (C-20), 26.9 (C-21), 38.3 (C-22), 66.5 (C-23), 14.3 (C-24), 16.7 (C-25), 17.2 (C-26), 24.6 (C-27), 180.6 (C-28), 27.0 (C-29), 17.3 (C-30).

**2a, 3β, 19a, 23-tetrahydroxyurs-12-en-28-oic acid-28-O-β-D-glucopyranoside (2):**

colorless needles (MeOD), mp 228~230 °C. ESI-MS (m/z): 1355.79 [2M+Na]<sup>+</sup>, 689.38 [M+Na]<sup>+</sup>. <sup>1</sup>H-NMR (500 MHz, MeOD): δ<sub>H</sub> 5.31 (2H, m), 3.79 (1H, dd, *J* = 12.0 Hz, *J* = 2.4 Hz), 3.67 (2H, m), 3.49 (1H, d, *J* = 10.8 Hz), 3.33-3.34 (5H, m), 3.26 (1H, d, *J* = 10.8 Hz), 1.33 (3H, s), 1.20 (3H, s), 1.02 (3H, s), 0.92 (3H, d, *J* = 6.8 Hz), 0.77 (3H, s), 0.69 (3H, s). <sup>13</sup>C-NMR (125 MHz, MeOD): δ<sub>C</sub> 47.9 (C-1), 69.7 (C-2), 78.3 (C-3), 42.9 (C-4), 48.8 (C-5), 19.2 (C-6), 33.5 (C-7), 41.2 (C-8), 48.2 (C-9), 39.0 (C-10), 24.8 (C-11), 129.5 (C-12), 139.7 (C-13), 41.2 (C-14), 29.6 (C-15), 26.5 (C-16), 48.5 (C-17), 54.9 (C-18), 73.6 (C-19), 42.8 (C-20), 27.2 (C-21), 38.3 (C-22), 66.4 (C-23), 13.8 (C-24), 16.6 (C-25), 17.6 (C-26), 24.7 (C-27), 178.5 (C-28), 27.0 (C-29), 17.6 (C-30), 95.7 (C-1'), 73.8 (C-2'), 78.3 (C-3'), 71.1 (C-4'), 78.5 (C-5'), 62.4 (C-6').

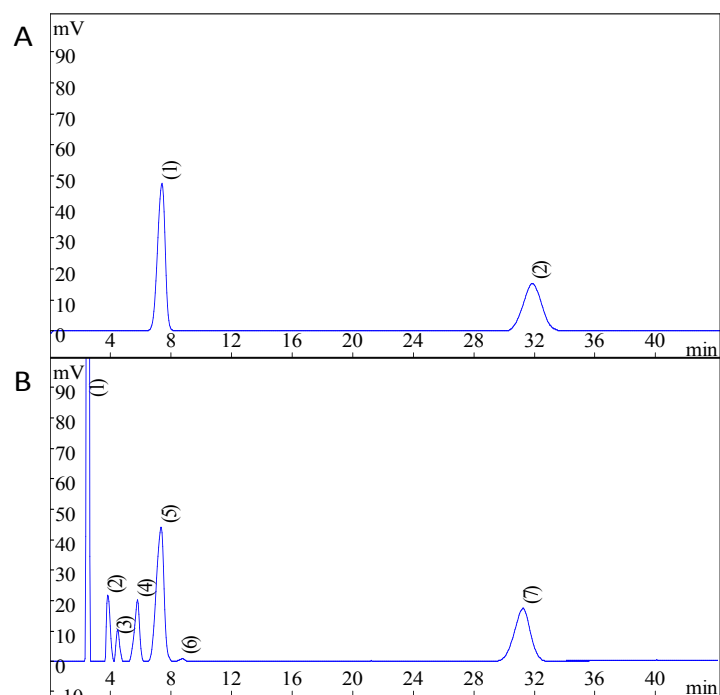

**Figure S3.1** High-performance liquid chromatography of standard solution and samples solution. A: standard solutions, (1): saponin , (2): sapogenin; B: sample solutions, (5): saponin, (7): sapogenin.

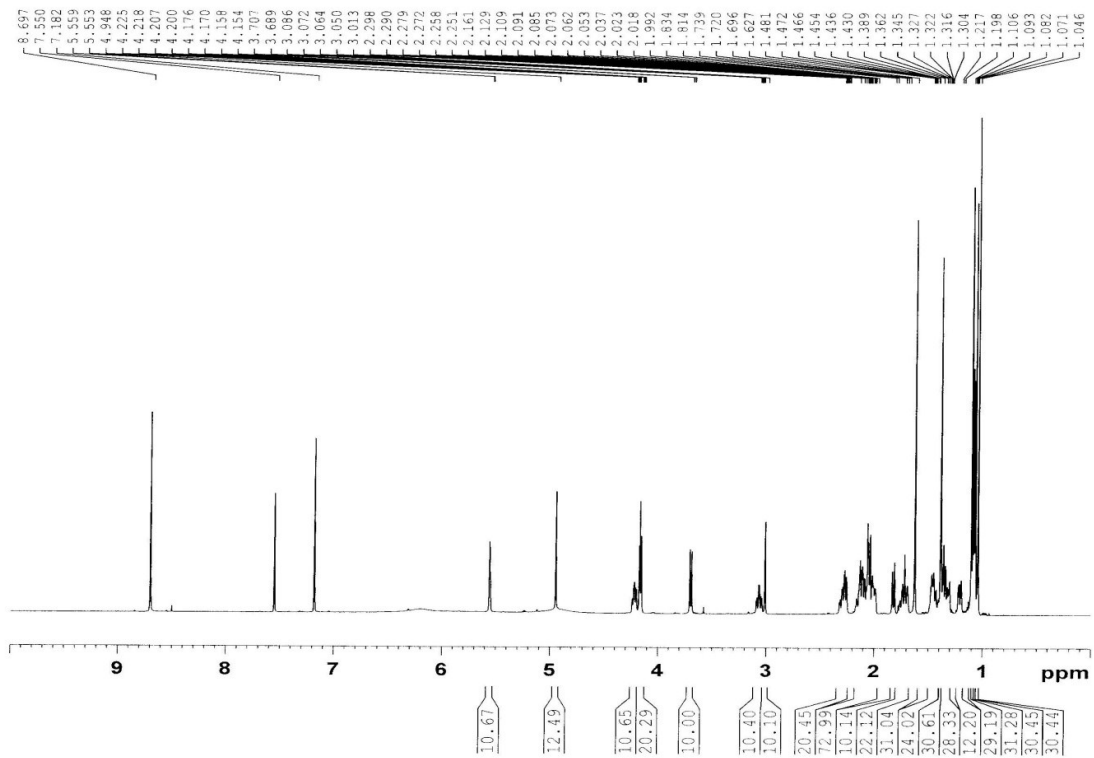

Figure S4.1  $^1\text{H}$  NMR spectrum (500 MHz,  $\text{C}_5\text{D}_5\text{N}$ ) of compound **1**

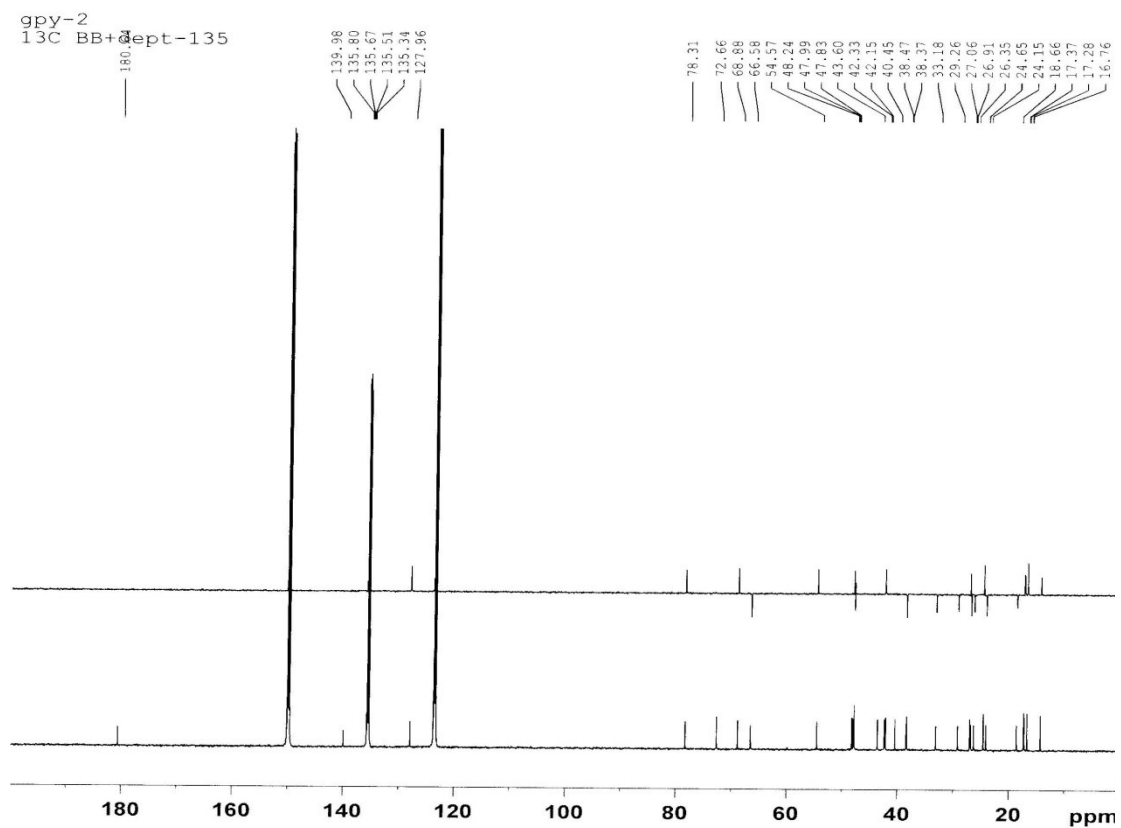

Figure S4.2  $^{13}\text{C}$  NMR spectrum (150 MHz,  $\text{C}_5\text{D}_5\text{N}$ ) of compound **1**

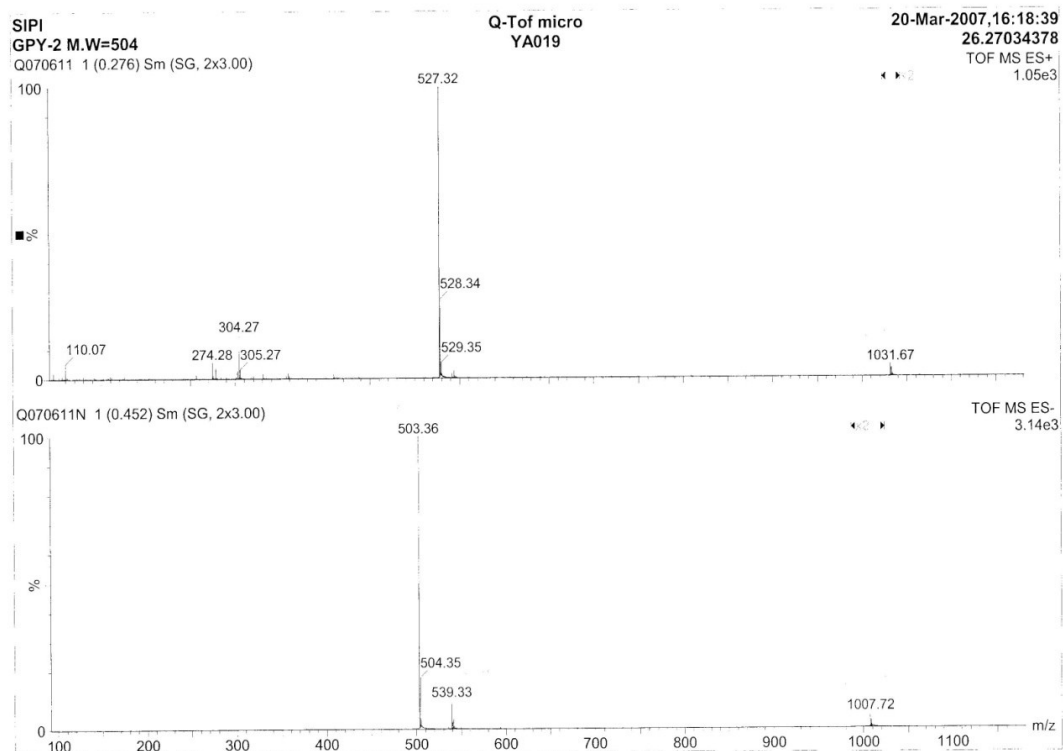

Figure S4.3 ESI-MS spectrum of compound 1

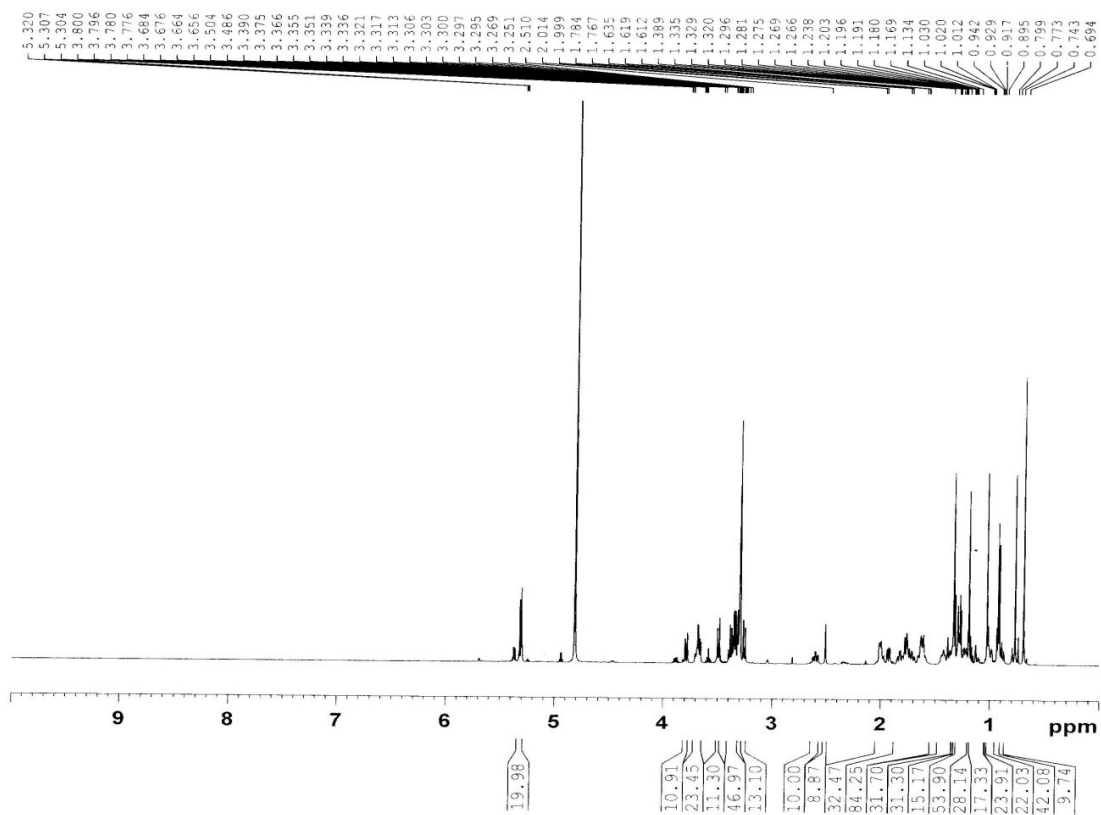

Figure S4.4  $^1\text{H}$  NMR spectrum (500 MHz, MeOD) of compound 2

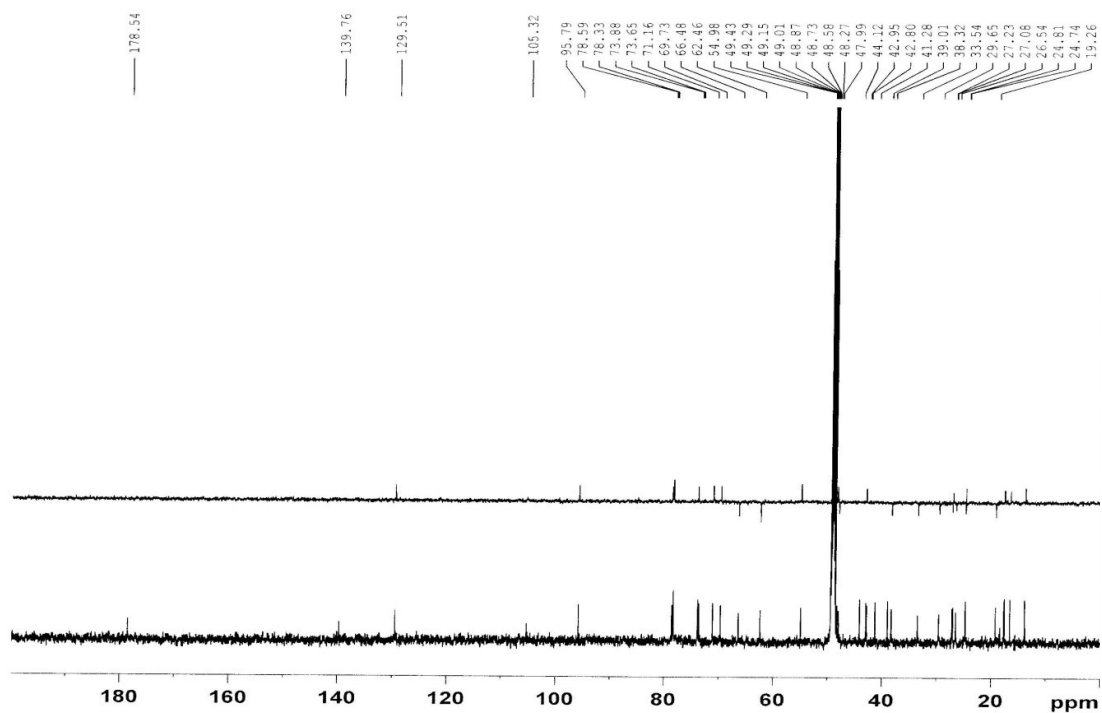

Figure S4.5  $^{13}\text{C}$  NMR spectrum (150 MHz, MeOD) of compound 2

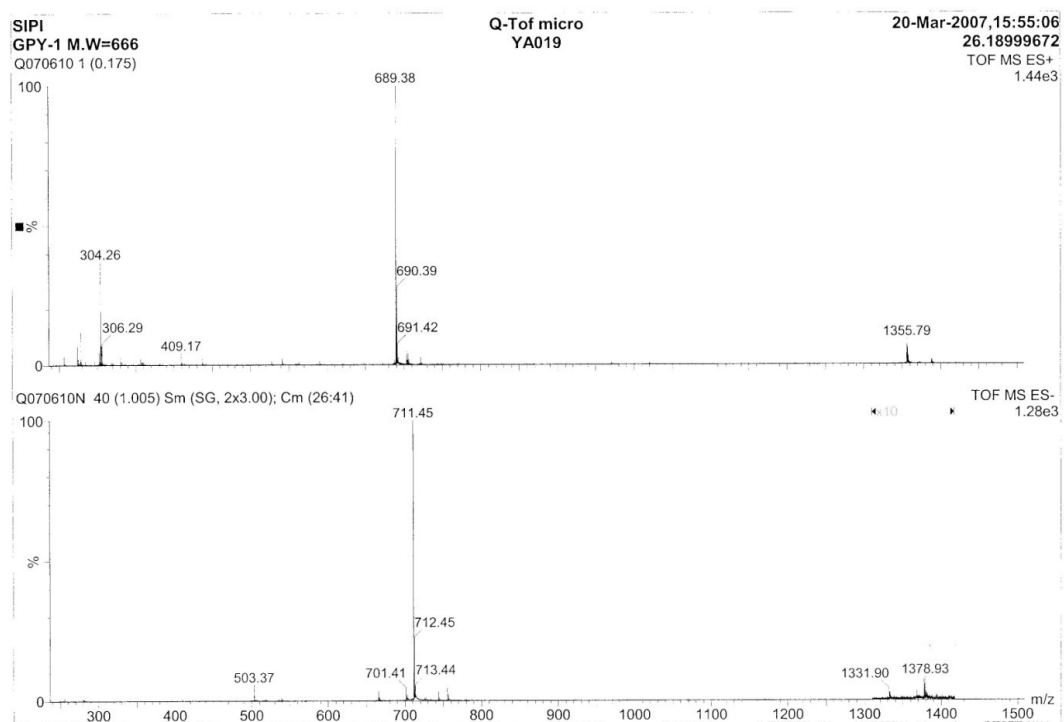

Figure S4.6 ESI-MS of compound 2

**Table S1** <sup>13</sup>C NMR (125MHz) data for compounds **1** and **2** (in C<sub>5</sub>D<sub>5</sub>N and MeOD).

| No. | <b>1</b> | <b>2</b> |
|-----|----------|----------|
|     | δc       | δc       |
| 1   | 47.8     | 47.9     |
| 2   | 68.8     | 69.7     |
| 3   | 78.3     | 78.3     |
| 4   | 42.1     | 42.9     |
| 5   | 47.9     | 48.8     |
| 6   | 18.6     | 19.2     |
| 7   | 33.1     | 33.5     |
| 8   | 40.4     | 41.2     |
| 9   | 47.8     | 48.2     |
| 10  | 38.3     | 39.0     |
| 11  | 24.1     | 24.8     |
| 12  | 127.9    | 129.5    |
| 13  | 139.9    | 139.7    |
| 14  | 42.1     | 41.2     |
| 15  | 29.2     | 29.6     |
| 16  | 26.3     | 26.5     |
| 17  | 48.3     | 48.5     |
| 18  | 54.5     | 54.9     |
| 19  | 72.6     | 73.6     |
| 20  | 42.3     | 42.8     |
| 21  | 26.9     | 27.2     |
| 22  | 38.3     | 38.3     |
| 23  | 66.5     | 66.4     |
| 24  | 14.3     | 13.8     |
| 25  | 16.7     | 16.6     |
| 26  | 17.2     | 17.6     |
| 27  | 24.6     | 24.7     |
| 28  | 180.6    | 178.5    |
| 29  | 27.0     | 27.0     |
| 30  | 17.3     | 17.6     |
| 1'  |          | 95.7     |
| 2'  |          | 73.8     |
| 3'  |          | 78.3     |
| 4'  |          | 71.1     |
| 5'  |          | 78.5     |
| 6'  |          | 62.4     |



**Table S2** Levels and code of variable used for Box–Behnken design (BBD).

| Independent variables                 | Symbol | Range and level |     |     |
|---------------------------------------|--------|-----------------|-----|-----|
|                                       |        | -1              | 0   | 1   |
| ethanol concentration (%)             | $X_1$  | 50              | 60  | 70  |
| extraction time(min)                  | $X_2$  | 8               | 10  | 12  |
| ratio of liquid to raw material(mL/g) | $X_3$  | 20              | 25  | 30  |
| microwave power(W)                    | $X_4$  | 400             | 500 | 600 |

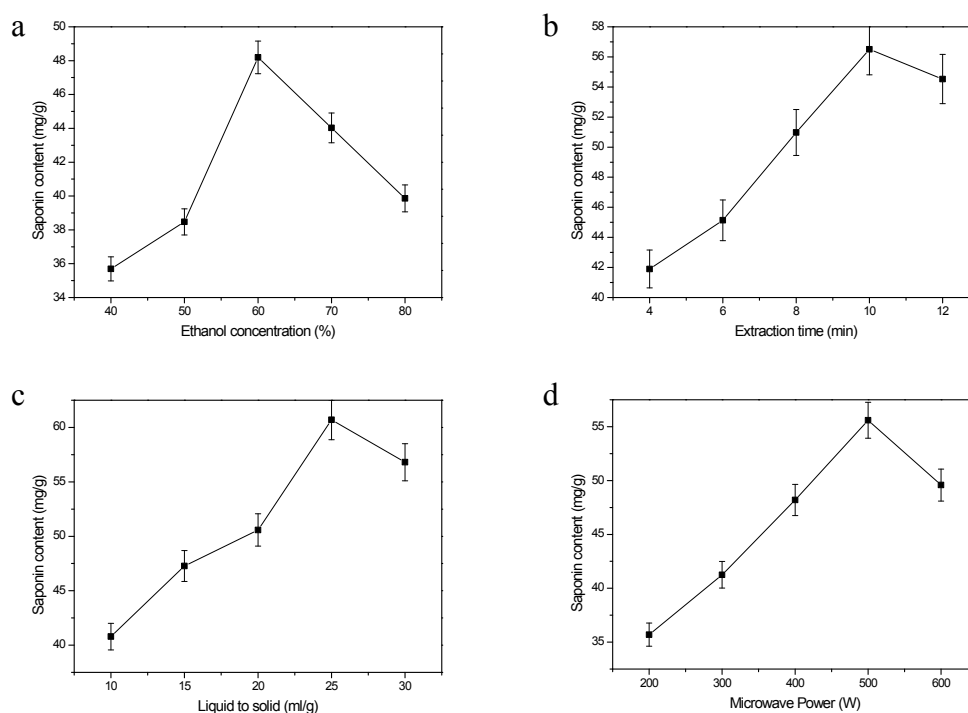

**Figure S6.1** Effects of the extraction time ( $X_1$ ), extraction time ( $X_2$ ), liquid to raw material ( $X_3$ ) and microwave power ( $X_4$ ) on the saponin content of *Rosa laevigata* Michx. fruits.

**Table S3** Predicted and experimental values of the responses at optimal conditions.

| Optimum condition                 |                                |                                                 |                              | content of TTSs ( $Y$ ; mg/g) |           |
|-----------------------------------|--------------------------------|-------------------------------------------------|------------------------------|-------------------------------|-----------|
| Ethanol concentration ( $X_1$ ;%) | extraction time ( $X_2$ ; min) | ratio of liquid to raw material ( $X_3$ ; mL/g) | microwave power ( $X_4$ ; W) | Experiment al                 | Predicted |
| 69                                | 12                             | 26:1                                            | 528                          | 62.48±0.25                    | 62.69     |

### S. 8.1 Preparation of standard solutions and sample solutions

### S. 8.1.1 The preparation of standard solutions

Dried compounds **1** (5 mg) and **2** (2.8 mg) were accurately weighed, and dissolved in a 10 mL volumetric flask with 10 mL methanol.

### S. 8.1.2 The preparation of sample solutions

Dried RMLF were powdered and sieved (40 mesh), and accurately weighed 5 g, respectively. They were dissolved in a 50 mL volumetric flask with 50 mL of CH<sub>2</sub>Cl<sub>2</sub> and MeOH (5:1), then performed using ultrasonic wave for 30 min and dried under reduced pressure. The dried samples were diluted to 50 mL in a volumetric flask with 50 mL methanol, and then also conducted using ultrasonic wave for 30 min.

## S. 9.1 Validation of the predictive model

### S. 9.1.1 Linearity studies.

According to HPLC analysis conditions, the standard solutions of 5, 10, 15, 20, 25, 30, 40  $\mu$ L were filtered using a 0.22  $\mu$ m filter, and injected into high performance liquid phase instrument. The calibration curve was acquired by the linear regression analysis. The standard curves of compounds **1** and **2** were showed in **Figure S9.1**. The linearity equations of compounds **1** and **2** measured at 210 nm were  $y = 5868.69x + 6.6558$  and  $y = 9945.21x - 0.90256$ , and their regression coefficients were 0.9970 and 0.9969, respectively. Good linearity was confirmed with above description.

### S. 9.1.2 The precision studies

The standard solution of 10  $\mu$ L was filtered using a 0.22  $\mu$ m filter, and determined for five times using HPLC analysis conditions. Then peak areas were recorded. RSDs of compounds **1** and **2** were 0.95% and 0.62%, which displayed good precision.

### S. 9.1.3 Reproducibility of this method

RLMF powder of three equal parts was precisely weighed. The sample solution of 25  $\mu$ L was determined using HPLC analysis conditions, and filtered using a 0.22  $\mu$ m filter each time, then recorded peak areas. The reproducibility research was performed by calculating peak areas. RSDs

confirmed of compounds **1** and **2** were 2.5% and 1.4%, which showed satisfactory reproducibility.

#### S. 9.1.4 Recovery studies

The recovery research was carried out via standard addition method. Compounds **1** (3.2 mg, 3.19 mg, 3.2 mg) and **2** (3.4 mg, 3.39 mg, 3.38 mg) were separately added to RLMF powders (5 g), and analyzed at each addition. From Table 3-1, it indicated that the recoveries of compounds **1** and **2** were 101.56% (RSD: 1.58%) and 102.94% (RSD: 0.97%), respectively. Good recovery was confirmed with above result.

#### S. 9.1.5 Stability test of the solutions

The sample solution of 25 $\mu$ L was filtered using a 0.22  $\mu$ m filter, and injected into high performance liquid phase instrument every 3 h for 5 times. Peak shapes of 5 were stable, which implied good stability of the sample solution. Thus, this method offered fit accurateness for determination of the sample solution in RLMF.

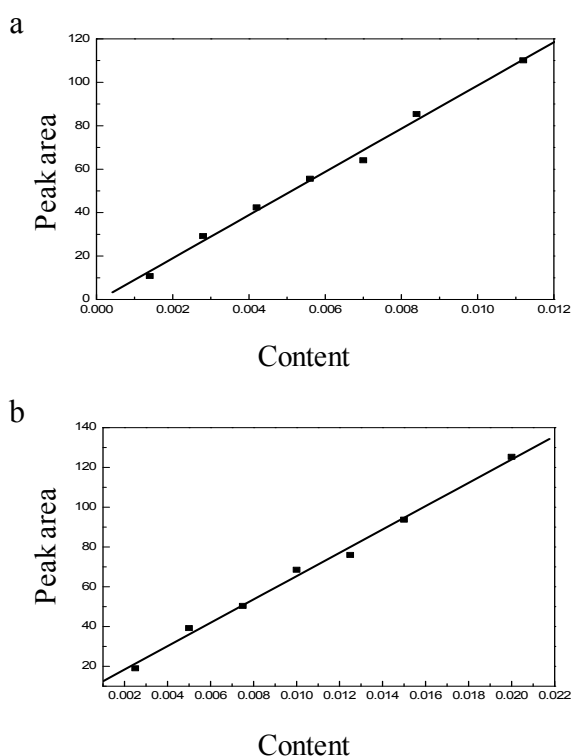

**Figure S9.1** The standard curves of compounds **1** and **2** (a and b) for Linearity studies.

**Table S4** Recoveries of compounds **1** and **2**

| Triterpenoids | Added<br>(mg/g, n=3) | Test values<br>(mg/g, n=3) | Recovery<br>(%, n=3) | RSD<br>(%, n=3) |
|---------------|----------------------|----------------------------|----------------------|-----------------|
|---------------|----------------------|----------------------------|----------------------|-----------------|

---

|          |      |      |        |      |
|----------|------|------|--------|------|
| <b>1</b> | 0.64 | 0.65 | 101.56 | 1.58 |
| <b>2</b> | 0.68 | 0.70 | 102.94 | 0.97 |

---
